# Supplementary material
Source: publisher figshare collection journal article supplement (https://karger.figshare.com/ndownloader/files/16435355)
Supplement: Supplementary file 1 [file 16435355]

**Appendix A**

- 410
- 411 [1] Burgard JF, Donohue B, Azrin NH, Teichner G. Prevalence and treatment of  
412 substance abuse in the mentally retarded population: An empirical review. *J*  
413 *Psychoactive Drugs* 2000; 32: 293-8.
- 414 [2] Degenhardt L. Interventions for people with alcohol use disorders and an intellectual  
415 disability: A review of the literature. *J Intellect Dev Disabil* 2000; 25: 135-146.
- 416 [3] Cocco KM, Harper DC. Substance use in people with mental retardation: A missing  
417 link in understanding community outcomes? *Rehabil Couns Bull* 2002; 46: 34-41.
- 418 [4] Cocco KM, Harper DC. Substance use in people with mental retardation: Assessing  
419 potential problem areas. *Ment Health Asp Dev Disabil* 2002; 5: 101-8.
- 420 [5] Barrett N, Paschos D. Alcohol-related problems in adolescents and adults with  
421 intellectual disabilities. *Curr Opin Psychiatry* 2006; 19: 481-5.
- 422 [6] McGillicuddy NB. A review of substance use research among those with mental  
423 retardation. *Ment Retard Dev Disabil Res Rev* 2006; 12: 41-7.
- 424 [7] Slayter EM. Substance abuse and mental retardation: Balancing risk management  
425 with the "dignity of risk". *Fam Soc* 2007; 88: 651-61.
- 426 [8] Taggart L, Huxley A, Baker G. Alcohol and illicit drug misuse in people with learning  
427 disabilities: Implications for research and service development. *Adv Ment Health*  
428 *Intellect Disabil* 2008; 2: 11-21.
- 429 [9] Steinberg ML, Heimlich L, Williams JM. Tobacco use among individuals with  
430 intellectual or developmental disabilities: A brief review. *Intellect Dev Disabil* 2009; 47:  
431 197-207.
- 432 [10] Carroll Chapman SL, Wu LT. Substance abuse among individuals with intellectual  
433 disabilities. *Res Dev Disabil* 2012; 33: 1147-56.
- 434 [11] Kerr S, Lawrence M, Darbyshire C, Middleton AR, Fitzsimmons L. Tobacco and  
435 alcohol-related interventions for people with mild/moderate intellectual disabilities: A  
436 systematic review of the literature. *J Intellect Disabil Res* 2013; 57: 393-408.
- 437 [12] Van Duijvenbode N, VanDerNagel JEL, Didden R, Engels RCME, Buitelaar JK,  
438 Kiewik M, De Jong CAJ. Substance use disorders in individuals with mild to  
439 borderline intellectual disability: Current status and future directions. *Res Dev Disabil*  
440 2015; 38: 319-28.
- 441 [13] Pilapil M, DeLaet D. Health risk behaviors in adolescents and young adults with  
442 special health care needs. *Curr Opin Pediatr* 2015; 27: 132-7.
- 443 [14] Day C, Lampraki A, Ridings D, Currell K. Intellectual disability and substance  
444 use/misuse: A narrative review. *J Intellect Disabil Offending Behav* 2016; 7: 25-34.
- 445 [15] Guimarães FJ, Marian, MR, Freitag Pagliuca LM. Psychoactive substance use and  
446 disabled people: An integrative review. *Health* 2016; 8: 1411-22.

- 447 [16] Juberg A, Rostad M, Sondenaa E. Substance use problems among people with  
448 mild/borderline intellectual disability: Challenges to mainstream multidisciplinary  
449 specialist substance treatment in Norway. *Nor Stud Alcohol Drugs* 2017; 34: 173-85.
- 450 [17] Williams F, Kouimtsidis C, Baldacchino A. Alcohol use disorders in people with  
451 intellectual disability. *BJPsych Adv* 2018; 24: 264-72.
- 452 [18] Huxley A, Dalton M, Tsui YYY, Hayhurst KP. Prevalence of alcohol, smoking, and  
453 illicit drug use amongst people with intellectual disabilities: Review. *Drugs*, in press.
- 454 [19] Ruedrich SL, Rossvanes CF, Dunn JE, DeLano MK. Cigarette smoking, and the use  
455 of tobacco products, by persons with developmental disabilities. *Ment Health Asp Dev*  
456 *Disabil* 2003; 6: 99-106.
- 457 [20] Brown G, Coldwell B. Developing a controlled drinking programme for people with  
458 learning disabilities living in conditions of medium security. *Addict Res Theory* 2006;  
459 14: 87-95.
- 460 [21] Slayter EM. Understanding and overcoming barriers to substance abuse treatment  
461 access for people with mental retardation. *J Soc Work Disabil Rehabil* 2008; 7: 63-80.
- 462 [22] Slayter EM, Steenrod SA. Addressing alcohol and drug addiction among people with  
463 mental retardation in nonaddiction settings: A need for cross-system collaboration. *J*  
464 *Soc Work Prac Addict* 2009; 9: 71-90.
- 465 [23] Simpson M. Alcohol and intellectual disability: Personal problem or cultural exclusion?  
466 *J Intellect Disab* 2012; 16: 183-92.
- 467 [24] Kouimtsidis C, Fodor-Wynne L, Scior K, Hunter R, Baio G, ... Hassiotis A. Extended  
468 brief intervention to address alcohol misuse in people with mild to moderate  
469 intellectual disabilities living in the community (EBI-LD): Study protocol for a  
470 randomised controlled trial. *Trials* 2015; 16: 114.
- 471 [25] Schijven EP, Engels RCME, Kleinjan M, Poelen EAP. Evaluating a selective  
472 prevention program for substance use and comorbid behavioral problems in  
473 adolescents with mild to borderline intellectual disabilities: Study protocol of a  
474 randomized controlled trial. *BMC Psychiatry* 2015; 15: 167.
- 475 [26] Van Duijvenbode N. The potential usefulness of implicit measures to assess and treat  
476 problematic substance use in individuals with mild to borderline intellectual disability:  
477 Setting a research agenda. *Adv Neurodev Disord* 2017; 1: 107-9.
- 478 [27] Van Duijvenbode N, Didden R, Korzilius HPLM, Engels RCME. The usefulness of  
479 implicit measures for the screening, assessment and treatment of problematic alcohol  
480 use in individuals with mild to borderline intellectual disability. *Adv Neurodev Disord*  
481 2017; 1: 42-51.
- 482 [28] Emerson E, Turnbull L. Self-reported smoking and alcohol use among adolescents  
483 with intellectual disabilities. *J Intellect Disabil* 2005; 9: 58-69.

- 484 [29] Jobling A, Cuskelly M. Young people with Down Syndrome: A preliminary  
485 investigation of health knowledge and associated behaviours. *J Intel Dev Disabil*  
486 2006; 31: 210-8.
- 487 [30] Kalyva E. Prevalence and influences on self-reported smoking among adolescents  
488 with mild learning disabilities, attention deficit hyperactivity disorder, and their typically  
489 developing peers. *J Intellect Disabil* 2007; 11: 267-79.
- 490 [31] McCrystal P, Percy A, Higgins K. Substance use behaviors of young people with a  
491 moderate learning disability: A longitudinal analysis. *Am J Drug Alcohol Abuse* 2007;  
492 33: 155-61.
- 493 [32] Slayter EM. Not immune: Access to substance abuse treatment among Medicaid-  
494 covered youth with mental retardation. *J Disabil Policy Stud* 2010; 20: 195-204.
- 495 [33] Zunic-Pavlovic V, Pavlovic M, Glumbic N. Drug use in adolescents with mild  
496 intellectual disability in different living arrangements. *Drugs* 2013; 20: 399-407.
- 497 [34] Gigi K, Werbeloff N, Goldberg S, Portuguese S, Reichenberg A, ..., Weiser M.  
498 Borderline intellectual functioning is associated with poor social functioning, increased  
499 rates of psychiatric diagnosis and drug use – A cross sectional population based  
500 study. *Eur Neuropsychopharmacol* 2014; 24: 1793-7.
- 501 [35] Kepper A, Koning I, Vollebergh W, Monshouwer K. Risk of early onset substance use  
502 among students with and without mild academic disabilities: Results of a discrete-time  
503 survival analysis. *Learn Disabil Res Prac* 2014; 29: 139-49.
- 504 [36] Emerson E, Hatton C, Robertson J, Baines S. Exposure to second hand smoke at  
505 home and child smoking at age 11 among British children with and without intellectual  
506 disability. *J Intellect Disabil Res* 2016; 60 274-81.
- 507 [37] Emerson E, Robertson J, Baines S, Hatton C. Predictors of self-reported alcohol use  
508 and attitudes toward alcohol among 11-year-old British children with and without  
509 intellectual disability. *J Intellect Disabil Res* 2016; 60: 1212-26.
- 510 [38] Kiewik M, VanDerNagel JEL, Kemna LEM, Engels RCME, De Jong CAJ. Substance  
511 use prevention program for adolescents with intellectual disabilities on special  
512 education schools: A cluster randomised control trial. *J Intellect Disabil Res* 2016; 60:  
513 191-200.
- 514 [39] Kiewik M, VanDerNagel JEL, Engels RCME, De Jong CAJ. The efficacy of an e-  
515 learning prevention program for substance use among adolescents with intellectual  
516 disabilities: A pilot study. *Res Dev Disabil* 2017; 63: 160-6.
- 517 [40] Pacoricona Alfaro DL, Ehlinger V, Spilka S, Ross J, Sentenac M, Godeau E. Alcohol,  
518 tobacco and cannabis use: Do students with mild-intellectual disability mimic students  
519 in the general population? *Res Dev Disabil* 2017; 63: 118-31.

- 520 [41] Reis O, Wetzel B, Hassler F. Mild or borderline intellectual disability as a risk for  
521 alcohol consumption in adolescents – A matched-pair study. *Res Dev Disabil* 2017;  
522 63: 132-41.
- 523 [42] Savage MN, Bouck EC. Predictors of risky behaviour and offending for adolescents  
524 with mild intellectual disability. *Intellect Dev Disabil* 2017; 55: 154-66.
- 525 [43] Taukoor B, Paruk S, Karim E, Burns JK. Substance use in adolescents with mental  
526 illness in Durban, South Africa. *J Child Adolesc Ment Health* 2017; 29: 51-6.
- 527 [44] Robertson J, Emerson E, Baines S, Hatton C. Self-reported smoking, alcohol and  
528 drug use among adolescents and young adults with and without mild to moderate  
529 intellectual disability. *J Intellect Dev Disabil*, in press.
- 530 [45] Asscher JJ, Van der Put CW, Stams GJJM. Differences between juvenile offenders  
531 with and without intellectual disability in offense type and risk factors. *Res Dev Disabil*  
532 2012; 33: 1905-13.
- 533 [46] Vinkers DJ. Pre-trial reported defendants in the Netherlands with intellectual disability,  
534 borderline and normal intellectual functioning. *J Appl Res Intellect Disabil* 2013; 26:  
535 357-61.
- 536 [47] Van der Put CE, Asscher JJ, Stams GJJM, Moonen XMH. Differences between  
537 juvenile offenders with and without intellectual disabilities in the importance of static  
538 and dynamic risk factors for recidivism. *J Intellect Disabil Res* 2014; 58: 992-1003.
- 539 [48] Kislyakov PA. Risk factors related to antisocial behavior in teenagers with intellectual  
540 disabilities. *Psychol Russia* 2017; 10: 215-27.
- 541 [49] Segeren MW, Fassaert TJJ, Kea R, De Wit MAS, Popma A. Exploring differences in  
542 criminogenic risk factors and criminal behavior between young adult violent offenders  
543 with and without mild to borderline intellectual disability. *Int J Offender Ther Comp*  
544 *Criminol* 2018; 62: 978-99.
- 545 [50] Robertson J, Emerson E, Gregory N, Hatton C, Turner S, ..., Hallam A. Lifestyle  
546 related risk factors for poor health in residential settings for people with intellectual  
547 disabilities. *Res Dev Disabil* 2000; 21: 469-86.
- 548 [51] Havercamp SM, Scandlin D, Roth M. Health disparities among adults with  
549 developmental disabilities, adults with other disabilities, and adults not reporting  
550 disability in North Carolina. *Public Health Rep* 2004; 119: 418-26.
- 551 [52] Taylor NS, Standen PJ, Cutajar P, Fox D, Wilson DN. Smoking prevalence and  
552 knowledge of associated risks in adult attenders at day centres for people with  
553 learning disabilities. *J Intellect Disabil Res* 2004; 48: 239-44.
- 554 [53] Cooper SA, Smiley E, Morrison J, Williamson A, Allan L.. Mental ill-health in adults  
555 with intellectual disabilities: Prevalence and associated factors. *Br J Psychiatry* 2007;  
556 190: 27-35.

- 557 [54] Smiley E, Cooper SA, Finlayson J, Jackson A, Allan L, ..., Morrison J. Incidence and  
558 predictors of mental ill-health in adults with intellectual disabilities. *Br J Psychiatry*  
559 2007; 191: 313-9.
- 560 [55] Taggart L, McLaughlin D, Quinn B, McFarlane C. Listening to people with intellectual  
561 disabilities who misuse alcohol and drugs. *Health Soc Care Community* 2007; 15:  
562 360-8.
- 563 [56] Hassiotis A, Strydom A, Hall I, Ali A, Lawrence-Smith G, ..., Bebbington P.  
564 Psychiatric morbidity and social functioning among adults with borderline intelligence  
565 living in private households. *J Intellect Disabil Res* 2008; 52: 95-106.
- 566 [57] Lunskey Y, Bradley E, Durbin J, Koegl C. A comparison of patients with intellectual  
567 disability receiving specialised and general services in Ontario's psychiatric hospitals.  
568 *J Intellect Disabil Res* 2008; 52: 1003-12.
- 569 [58] Mantry D, Cooper SA, Smiley E, Morrison J, Allan L, ... Jackson A. The prevalence  
570 and incidence of mental ill-health in adults with Down Syndrome. *J Intellect Disabil*  
571 *Res* 2008; 52: 141-55.
- 572 [59] Wallace RA, Schluter P. Audit of cardiovascular disease risk factors among supported  
573 adults with intellectual disability attending an ageing clinic. *J Intel Dev Disabil* 2008;  
574 33: 48-58.
- 575 [60] Didden R, Embregts P, Van der Toorn M, Laarhoven N. Substance abuse, coping  
576 strategies, adaptive skills and behavioral and emotional problems in clients with mild  
577 to borderline intellectual disability admitted to a treatment facility: A pilot study. *Res*  
578 *Dev Disabil* 2009; 30: 927-32.
- 579 [61] Gale L, Naqvi H, Russ L. Asthma, smoking and BMI in adults with intellectual  
580 disabilities: A community-based survey. *J Intellect Disabil Res* 2009; 53: 787-96.
- 581 [62] Lunskey Y, Bradley E, Gracey CD, Durbin J, Koegl C. Gender differences in  
582 psychiatric diagnoses among inpatients with and without intellectual disabilities.  
583 *American Journal on Intellect Dev Disabil* 2009; 114: 52-60.
- 584 [63] Nettelbladt P, Göth M, Bogren M, Mattisson C. Risk of mental disorders in subjects  
585 with intellectual disability in the Lundby cohort 1947 – 97. *Nord J Psychiatry* 2009; 63:  
586 316-21.
- 587 [64] Raina P, Lunskey Y. A comparison study of adults with intellectual disability and  
588 psychiatric disorder with and without forensic involvement. *Res Dev Disabil* 2010; 31:  
589 218-23.
- 590 [65] Chaplin E, Gilvarry C, Tsakanikos E. Recreational substance use patterns and co-  
591 morbid psychopathology in adults with intellectual disability. *Res Dev Disabil* 2011;  
592 32: 2981-6.

- 593 [66] Emerson E. Health status and health risks of the “hidden majority” of adults with  
594 intellectual disability. *Intellect Dev Disabil* 2011; 49: 155-65.
- 595 [67] Haveman M, Perr, J, Salvador-Carulla L, Noonan Walsh P, Kerr M, ... Weber G.  
596 Ageing and health status in adults with intellectual disabilities: Results of the  
597 European POMONA II study. *J Intel Dev Disabil* 2011; 36: 49-60.
- 598 [68] Lunskey Y, Elserafi J. Life events and emergency department visits in response to  
599 crisis in individuals with intellectual disabilities. *J Intellect Disabil Res* 2011; 55: 714-8.
- 600 [69] Lunskey Y, Gracey CD, Koegl C, Bradley E, Durbin J, Raina P. The clinical profile and  
601 service needs of psychiatric inpatients with intellectual disabilities and forensic  
602 involvement. *Psychol Crime Law* 2011; 17: 9-23.
- 603 [70] Caton S, Chadwick D, Chapman M, Turnbull S, Mitchell D, Stanfield J. Healthy  
604 lifestyles for adults with intellectual disability: Knowledge, barriers and facilitators. *J*  
605 *Intel Dev Disabil* 2012; 37: 248-59.
- 606 [71] Emerson E, Brigham P. Health behaviours and mental health status of parents with  
607 intellectual disabilities: Cross sectional study. *Public Health* 2013; 127: 1111-6.
- 608 [72] Robertson J, Emerson E, Baines S, Hatton C. Obesity and health behaviours of  
609 British adults with self-reported intellectual impairments: cross sectional survey. *BMC*  
610 *Public Health* 2014; 14: 219.
- 611 [73] Turygin N, Matson JL, Adams HL, Williams LW. Co-occurring disorder clusters in  
612 adults with mild and moderate intellectual disability in residential treatment settings.  
613 *Res Dev Disabil* 2014; 35: 3156-61.
- 614 [74] VanDerNagel JEL, Kiewik M, Postel MG, Van Dijk M, Didden R, ..., De Jong CAJ.  
615 Capture recapture estimation of the prevalence of mild intellectual disability and  
616 substance use disorder. *Res Dev Disabil* 2014; 35: 808-13.
- 617 [75] Pezzoni V, Kouimtsidis C. Screening for alcohol misuse within people attending a  
618 psychiatric intellectual disability community services. *J Intellect Disabil Res* 2015; 59:  
619 353-9.
- 620 [76] Lin E, Balogh R, McGarry C, Selick A, Dobranowski K, ... Lunskey Y. Substance-  
621 related and addictive disorders among adults with intellectual and developmental  
622 disabilities (IDD): An Ontario population cohort study. *BMJ Open* 2016; 6: e011638.
- 623 [77] Axmon A, Sandberg M, Ahlström G. Gender differences in psychiatric diagnoses in  
624 older people with intellectual disability: A register study. *BMC Psychiatry* 2017; 17:  
625 192.
- 626 [78] Kerr S, Lawrence M, Middleton A, Fitzsimmons L, Darbyshire C. Tobacco and alcohol  
627 use in people with mild/moderate intellectual disabilities: Giving voice to their health  
628 promotion needs. *J Appl Res Intellect Disabil* 2017; 30: 612-26.

- 629 [79] McCarron M, Cleary E, McCallion P. Health and health-care utilization of the older  
630 population of Ireland: Comparing the intellectual disability population and the general  
631 population. *Res Ageing* 2017; 39: 693-718.
- 632 [80] Swerts C, Vandeveldel S, VanDerNagel JEL, Vanderplasschen W, Claes C, De Mayer  
633 J. Substance use among individuals with intellectual disabilities living independently  
634 in Flanders. *Res Dev Disabil* 2017; 63: 107-17.
- 635 [81] VanDerNagel JEL, Kiewik M, Didden R, Korzilius HPLM, Van Dijk M, ..., De Jong  
636 CAJ. Substance use in individuals with mild to borderline intellectual disability: An  
637 exploration of rates and risks in the Netherlands. *Adv Neurodev Disord* 2017; 1: 283-  
638 93.
- 639 [82] VanDerNagel JEL, Kiewik M, Van Dijk M, Didden R, Korzilius HPLM, ..., De Jong  
640 CAJ. Substance use in individuals with mild to borderline intellectual disability: A  
641 comparison between self-report, collateral-report and biomarker analysis. *Res Dev*  
642 *Disabil* 2017; 63: 151-9.
- 643 [83] Braatveit KJ, Torsheim T, Hove O. Screening for intellectual disabilities: A validation  
644 of the Hayes Ability Screening Index for in-patients with substance use disorder. *Nord*  
645 *J Psychiatry* 2018; 72: 387-92.
- 646 [84] Braatveit KJ, Torsheim T, Hove O. The prevalence and characteristics of intellectual  
647 and borderline intellectual disabilities in a sample of inpatients with substance use  
648 disorders: Preliminary clinical results. *J Ment Health Res Intellect Disabil* 2018; 11:  
649 203-20.
- 650 [85] Cocks E, Thomson A, Thoresen S, Parsons R, Rosenwax L. Factors that affect the  
651 perceived health of adults with intellectual disability: A Western Australian study. *J*  
652 *Intel Dev Disabil* 2018; 43: 339-50.
- 653 [86] Eisenbaum E. Tobacco product use and smoking frequency among US adults with  
654 intellectual and developmental disabilities. *J Intellect Disabil Res* 2018; 62: 709-18.
- 655 [87] Eisenbaum E, DiNitto DM, Bishop-Fitzpatrick L. Gender differences in tobacco use  
656 among US Special Olympics athletes. *Disabil Health J* 2018; 11: 466-70.
- 657 [88] Salavert J, Clarabuch A, Fernández-Gómez MJ, Barrau V, Giráldez MP, Borrás J.  
658 Substance use disorders in patients with intellectual disability admitted to psychiatric  
659 hospitalisation. *J Intellect Disabil Res* 2018; 62: 923-30.
- 660 [89] VanDerNagel JEL, Van Duijvenbode N, Ruedrich S, Ayu AP, Schellekens A. The  
661 perception of substance use disorder among clinicians, caregivers and family  
662 members of individuals with intellectual and developmental disabilities. *J Ment Health*  
663 *Res Intellect Disabil* 2018; 11: 54-68.
- 664 [90] McGillivray JA, Moore MR. Substance use by offenders with mild intellectual  
665 disability. *J Intel Dev Disabil* 2001; 26: 297-310.

- 666 [91] Chan J, Hudson C, Sigafos J. A preliminary study of offenders with intellectual  
667 disability and psychiatric disorder. *Ment Health Asp Dev Disabil* 2003; 6: 147-52.
- 668 [92] Scott D, McGilloway S, Donnelly M. The mental health needs of people with a  
669 learning disability detained in police custody. *Med Sci Law* 2006; 46: 111-4.
- 670 [93] Crocker AG, Côté G, Toupin J, St-Onge B. Rate and characteristics of men with an  
671 intellectual disability in pre-trial detention. *J Intel Dev Disabil* 2007; 32: 143-52.
- 672 [94] Sondenaa E, Rasmussen K, Palmstierna T, Nottestad J. The prevalence and nature  
673 of intellectual disability in Norwegian prisons. *J Intellect Disabil Res* 2008; 52: 1129-  
674 37.
- 675 [95] Männynsalo L, Putkonen H, Lindberg N, Kotilainen I. Forensic psychiatric perspective  
676 on criminality associated with intellectual disability: A nationwide register-based study.  
677 *J Intellect Disabil Res* 2009; 53: 279-88.
- 678 [96] Chester V, Green FN, Alexander RT. An audit of a smoking cessation programme for  
679 people with an intellectual disability resident in a forensic unit. *Adv Ment Health*  
680 *Intellect Disabil* 2011; 5: 33-41.
- 681 [97] Hassiotis A, Gazizova D, Akinlonu L, Bebbington P, Meltzer H, Strydom A. Psychiatric  
682 morbidity in prisoners with intellectual disabilities: Analysis of prison survey data for  
683 England and Wales. *Br J Psychiatry* 2011; 199: 156-7.
- 684 [98] Dias S, Ware RS, Kinner SA, Lennox NG. Co-occurring mental disorder and  
685 intellectual disability in a large sample of Australian prisoners. *Aust N Z J Psychiatry*  
686 2013; 47: 938-44.
- 687 [99] Lindsay WR, Carson D, Holland AJ, Taylor JL, O'Brien G, ..., Steptoe L. Alcohol and  
688 its relationship to offence variables in a cohort of offenders with intellectual disability.  
689 *J Intel Dev Disabil* 2013; 38: 325-31.
- 690 [100] Bhandari A, Van Dooren K, Eastgate G, Lennox N, Kinner SA. Comparison of social  
691 circumstances, substance use and substance-related harm in soon-to-be-released  
692 prisoners with and without intellectual disability. *J Intellect Disabil Res* 2015; 59: 571-  
693 9.
- 694 [101] McGillivray JA, Gaskin CJ, Newton DC, Richardson BA. Substance use, offending,  
695 and participation in alcohol and drug treatment programmes: A comparison of  
696 prisoners with and without intellectual disabilities. *J Appl Res Intellect Disabil* 2016;  
697 29: 289-94.
- 698 [102] Chaplin E, McCarthy J, Underwood L, Forrester A, Hayward H, ..., Murphy D.  
699 Characteristics of prisoners with intellectual disabilities. *J Intellect Disabil Res* 2017;  
700 61: 1185-95.



- 701 [103] Luteijn I, Didden R, VanDerNagel JEL. Individuals with mild intellectual disability or  
702 borderline intellectual functioning in a forensic addiction treatment center: Prevalence  
703 and clinical characteristics. *Adv Neurodev Disord* 2017; 1: 240-51.
- 704 [104] Houidi A, Paruk S. Profile of forensic state patients at a psychiatric unit in KwaZulu  
705 Natal, South Africa: Demographic, clinical and forensic factors. *J Forens Psychiatry*  
706 *Psychol* 2018; 29: 544-56.
- 707 [105] Whitaker S, Hughes M. Prevalence and influences on smoking in people with learning  
708 disabilities. *Br J Dev Disabil* 2003; 49: 91-7.
- 709 [106] Merriman S, Haw C, Kirk J, Stubbs J. Risk factors for coronary heart disease among  
710 inpatients who have mild intellectual disability and mental illness. *J Intellect Disabil*  
711 *Res* 2005; 49: 309-16.
- 712 [107] Rurangirwa J, Van Naarden Braun K, Schendel D, Yeargin-Allsopp M. Healthy  
713 behaviors and lifestyles in young adults with a history of developmental disabilities.  
714 *Res Dev Disabil* 2006; 27: 381-99.
- 715 [108] Taggart L, McLaughlin D, Quinn B, Milligan V. An exploration of substance misuse in  
716 people with intellectual disabilities. *J Intellect Disabil Res* 2006; 50: 588-97.
- 717 [109] McGuire BE, Daly P, Smyth F. Lifestyle and health behaviours of adults with an  
718 intellectual disability. *J Intellect Disabil Res* 2007; 51: 497-510.
- 719 [110] Slayter EM. Demographic and clinical characteristics of people with intellectual  
720 disabilities with and without substance abuse disorders in a Medicaid population.  
721 *Intellect Dev Disabil* 2010; 48: 417-31.
- 722 [111] Slayter EM. Medicaid-covered alcohol and drug treatment use among people with  
723 intellectual disabilities: Evidence of disparities. *Intellect Dev Disabil* 2010; 48: 361-74.
- 724 [112] VanDerNagel JEL, Kiewik M, Buitelaar JK, De Jong CAJ. Staff perspectives of  
725 substance use and misuse among adults with intellectual disabilities enrolled in Dutch  
726 disability services. *J Policy Pract Intellect Disabil* 2011; 8: 143-9.
- 727 [113] Van Straaten B, Schrijvers CTM, Van der Laan J, Boersma SN, Rodenburg G, Wolf  
728 JRLM, Van de Mheen D. Intellectual disability among Dutch homeless people:  
729 Prevalence and related psychosocial problems. *PloS One* 2014; 9: e86112.
- 730 [114] To WT, Neiryck S, Vanderplassen W, Vanheule S, Vandeveld S. Substance use  
731 and misuse in persons with intellectual disabilities (ID): Results of a survey in ID and  
732 addiction services in Flanders. *Res Dev Disabil* 2014; 35: 1-9.
- 733 [115] Nouwens PJG, Lucas R, Smulders NBM, Embregts PJCM, Van Nieuwenhuizen C.  
734 Identifying classes of persons with mild intellectual disability or borderline intellectual  
735 functioning: A latent class analysis. *BMC Psychiatry* 2017; 17: 257.

- 736 [116] Poelen EAP, Schijven EP, Otten R, Didden R. Personality dimensions and substance  
737 use in individuals with mild to borderline intellectual disabilities. *Res Dev Disabil* 2017;  
738 63: 142-50.
- 739 [117] To WT, Vanheule S, Vanderplasschen W, Audenaert K, Vandeveldel S. Screening for  
740 intellectual disability in persons with a substance abuse problem: Exploring the  
741 validity of the Hayes Ability Screening Index in a Dutch-speaking sample. *Res Dev*  
742 *Disabil* 2015; 36: 498-504.
- 743 [118] Van Duijvenbode N, Didden R, Van den Hazel T, Engels RCME. Psychometric  
744 qualities of a tetrad WAIS-III short form for use in individuals with mild to borderline  
745 intellectual disability. *Dev Neurorehabil* 2016; 19: 26-30.
- 746 [119] Slayter EM. Disparities in access to substance abuse treatment among people with  
747 intellectual disabilities and serious mental illness. *Health Soc Work* 2010; 35: 49-59.
- 748 [120] Slayter EM. Disparities in substance abuse treatment utilization among women with  
749 intellectual disability. *J Soc Work Disabil Rehabil* 2016; 15: 96-115.
- 750 [121] Nouwens PJG, Smulders NBM, Embregts PJCM, Van Nieuwenhuizen C. Meeting the  
751 support needs of persons with mild intellectual disability or borderline intellectual  
752 functioning: Still a long way to go. *J Intellect Disabil Res* 2017; 61: 1104-16.
- 753 [122] Mendel E, Hipkins J. Motivating learning disabled offenders with alcohol-related  
754 problems: A pilot study. *Br J Learn Disabil* 2002; 30: 153-8.
- 755 [123] Frielink N, Schuengel C, Kroon A, Embregts PJCM. Pretreatment for substance-  
756 abusing people with intellectual disabilities: Intervening on autonomous motivation for  
757 treatment entry. *J Intellect Disabil Res* 2015; 59: 1168-82.
- 758 [124] Pols J, Althoff B, Bransen E. The limits of autonomy: Ideals in care for people with  
759 learning disabilities. *Med Anthropol* 2017; 36: 772-85.
- 760 [125] Singh NN, Lancioni GE, Winton ASW, Singh ANA, Singh J, Singh ADA. Effects of a  
761 mindfulness-based smoking cessation program for an adult with mild intellectual  
762 disability. *Res Dev Disabil* 2011; 32: 1180-5.
- 763 [126] Singh NN, Lancioni GE, Winton ASW, Karazsia BT, Singh ADA, ..., Singh J. A  
764 mindfulness-based smoking cessation program for individuals with mild intellectual  
765 disability. *Mindfulness* 2013; 4: 148-57.
- 766 [127] Singh NN, Lancioni GE, Myers RE, Karazsia BT, Winton ASW, Singh J. A  
767 randomized controlled trial of a mindfulness-based smoking cessation program for  
768 individuals with mild intellectual disability. *Int J Ment Health Addict* 2014; 12: 153-68.
- 769 [128] Kouimtsidis C, Bosco A, Scior K, Baio G, Hunter R, ..., Hassiotis A. A feasibility  
770 randomised controlled trial of extended brief intervention for alcohol misuse in adults  
771 with mild to moderate intellectual disabilities living in the community; The EBI-LD  
772 study. *Trials* 2017; 18: 216.

- 773 [129] Kouimtsidis C, Scior K, Biao G, Hunter R, Pezzoni V, Hassiotis A. Development and  
774 evaluation of a manual for extended brief intervention for alcohol misuse for adults  
775 with mild to moderate intellectual disability living in the community: The EBI-LD study  
776 manual. *J Appl Res Intellect Disabil* 2017; 30: 42-8.
- 777 [130] Van Duijvenbode N, Didden R, Bloemsaat G, Engels RCME. Problematic alcohol use  
778 and mild intellectual disability: standardization of pictorial stimuli for an alcohol cue  
779 reactivity task. *Res Dev Disabil* 2012; 33: 1095-102.
- 780 [131] Van Duijvenbode N, Didden R, Voogd H, Korzilius HPLM, Engels RCME. Cognitive  
781 biases in individuals with mild to borderline intellectual disability and alcohol use-  
782 related problems. *Res Dev Disabil* 2012; 33: 1928-36.
- 783 [132] Van Duijvenbode N, Didden R, Korzilius HPLM, Engels RCME. The addicted brain:  
784 Cognitive biases in problematic drinkers with mild to borderline intellectual disability. *J*  
785 *Intellect Disabil Res* 2016; 60: 242-53.
- 786 [133] Van Duijvenbode N, Didden R, Korzilius HPLM, Engels RCME. Everybody  
787 is...drinking! Interpretation bias in problematic drinkers with mild to borderline  
788 intellectual disability. *J Ment Health Res Intellect Disabil* 2016; 9: 101-17.
- 789 [134] Van Duijvenbode N, Didden R, Korzilius HPML, Engels RCME. Attentional bias in  
790 problematic drinkers with and without mild to borderline intellectual disability. *J*  
791 *Intellect Disabil Res* 2017; 61: 255-65.
- 792 [135] Van Duijvenbode N, Didden R, VanDerNagel JEL, Korzilius HPLM, Engels RCME.  
793 The relationship between drinking motives and interpretation bias in problematic  
794 drinkers with mild to borderline intellectual disability. *J Intel Dev Disabil* 2018; 43: 125-  
795 36.
- 796 [136] Van Duijvenbode N, Didden R, Korzilius HPLM, Trentelman M, Engels RCME.  
797 Executive control in long-term abstinent alcoholics with mild to borderline intellectual  
798 disability: The relationship with IQ and severity of alcohol use-related problems. *Res*  
799 *Dev Disabil* 2013; 34: 3583-95.
- 800 [137] Van Duijvenbode N, Didden R, Korzilius HPLM, Engels RCME. The role of executive  
801 control and readiness to change in problematic drinkers with mild to borderline  
802 intellectual disability. *J Appl Res Intellect Disabil* 2017; 30: 885-97.
- 803 [138] Van Duijvenbode N, Didden R, VanDerNagel JEL, Korzilius HPLM, Engels RCME.  
804 Cognitive deficits in problematic drinkers with and without mild to borderline  
805 intellectual disability. *J Intellect Disabil* 2018; 22: 5-17.
